# Supplementary material
Source: PubMed Central journal article supplement (PMC6542718)
Supplement: NIHMS1029987-supplement-1.pdf [file NIHMS1029987-supplement-1.pdf]

Supplementary Table 1. Pairwise linkage disequilibrium ( $r^2$  value) for 34 SNPs spanning *SETBP1* according to the CEU sub-population as extracted in LDlink (<https://analysistools.nci.nih.gov/LDlink/?tab=home>).

|    | 1          | 2   | 3     | 4     | 5     | 6     | 7     | 8     | 9     | 10    | 11    | 12    | 13    | 14    | 15    | 16    | 17    | 18    | 19    | 20    | 21    | 22    | 23    | 24    | 25    | 26    | 27    | 28    | 29    | 30    | 31    | 32    | 33    | 34    |       |
|----|------------|-----|-------|-------|-------|-------|-------|-------|-------|-------|-------|-------|-------|-------|-------|-------|-------|-------|-------|-------|-------|-------|-------|-------|-------|-------|-------|-------|-------|-------|-------|-------|-------|-------|-------|
| 1  | rs1037939  | 1.0 | 0.121 | 0.044 | 0.005 | 0.025 | 0.000 | 0.000 | 0.002 | 0.002 | 0.013 | 0.029 | 0.029 | 0.021 | 0.002 | 0.0   | 0.009 | 0.011 | 0.011 | 0.007 | 0.014 | 0.025 | 0.000 | 0.015 | 0.002 | 0.010 | 0.000 | 0.001 | 0.012 | 0.002 | 0.002 | 0.002 | 0.003 | 0.010 |       |
| 2  | rs744279   |     | 1.0   | 0.000 | 0.001 | 0.047 | 0.174 | 0.111 | 0.064 | 0.096 | 0.005 | 0.018 | 0.000 | 0.000 | 0.003 | 0.007 | 0.000 | 0.000 | 0.000 | 0.000 | 0.003 | 0.002 | 0.002 | 0.000 | 0.022 | 0.002 | 0.017 | 0.003 | 0.016 | 0.015 | 0.009 | 0.001 | 0.001 | 0.002 | 0.003 |
| 3  | rs12607198 |     |       | 1.0   | 0.591 | 0.084 | 0.060 | 0.045 | 0.005 | 0.002 | 0.007 | 0.012 | 0.007 | 0.007 | 0.006 | 0.002 | 0.010 | 0.013 | 0.014 | 0.014 | 0.002 | 0.000 | 0.000 | 0.007 | 0.000 | 0.009 | 0.014 | 0.001 | 0.024 | 0.021 | 0.033 | 0.007 | 0.000 | 0.005 | 0.013 |
| 4  | rs7230525  |     |       |       | 1.0   | 0.151 | 0.101 | 0.031 | 0.010 | 0.004 | 0.007 | 0.016 | 0.001 | 0.001 | 0.007 | 0.011 | 0.011 | 0.000 | 0.001 | 0.001 | 0.001 | 0.001 | 0.004 | 0.000 | 0.000 | 0.007 | 0.014 | 0.010 | 0.005 | 0.004 | 0.004 | 0.000 | 0.002 | 0.001 | 0.001 |
| 5  | rs16978151 |     |       |       |       | 1.0   | 0.083 | 0.083 | 0.141 | 0.092 | 0.000 | 0.007 | 0.048 | 0.048 | 0.001 | 0.009 | 0.023 | 0.005 | 0.006 | 0.006 | 0.002 | 0.016 | 0.095 | 0.007 | 0.030 | 0.000 | 0.014 | 0.001 | 0.013 | 0.022 | 0.036 | 0.000 | 0.001 | 0.000 | 0.007 |
| 6  | rs7232987  |     |       |       |       |       | 1.0   | 0.689 | 0.318 | 0.520 | 0.001 | 0.088 | 0.039 | 0.039 | 0.012 | 0.020 | 0.000 | 0.000 | 0.001 | 0.001 | 0.010 | 0.006 | 0.028 | 0.001 | 0.052 | 0.009 | 0.018 | 0.006 | 0.025 | 0.043 | 0.051 | 0.025 | 0.005 | 0.001 | 0.041 |
| 7  | rs11872638 |     |       |       |       |       |       | 1.0   | 0.465 | 0.728 | 0.001 | 0.088 | 0.050 | 0.050 | 0.012 | 0.032 | 0.005 | 0.000 | 0.000 | 0.000 | 0.010 | 0.011 | 0.039 | 0.005 | 0.052 | 0.001 | 0.031 | 0.001 | 0.037 | 0.043 | 0.064 | 0.025 | 0.016 | 0.005 | 0.041 |
| 8  | rs8085464  |     |       |       |       |       |       |       | 1.0   | 0.654 | 0.005 | 0.030 | 0.060 | 0.060 | 0.002 | 0.012 | 0.004 | 0.012 | 0.016 | 0.016 | 0.000 | 0.003 | 0.031 | 0.002 | 0.037 | 0.002 | 0.015 | 0.001 | 0.004 | 0.026 | 0.025 | 0.010 | 0.001 | 0.002 | 0.018 |
| 9  | rs12232728 |     |       |       |       |       |       |       |       | 1.0   | 0.001 | 0.097 | 0.049 | 0.049 | 0.026 | 0.035 | 0.000 | 0.001 | 0.002 | 0.002 | 0.020 | 0.018 | 0.033 | 0.000 | 0.079 | 0.002 | 0.034 | 0.001 | 0.042 | 0.041 | 0.059 | 0.018 | 0.017 | 0.008 | 0.039 |
| 10 | rs9945779  |     |       |       |       |       |       |       |       |       | 1.0   | 0.024 | 0.028 | 0.028 | 0.021 | 0.000 | 0.152 | 0.020 | 0.020 | 0.020 | 0.031 | 0.008 | 0.013 | 0.136 | 0.033 | 0.001 | 0.006 | 0.013 | 0.010 | 0.009 | 0.018 | 0.015 | 0.003 | 0.004 | 0.009 |
| 11 | rs644286   |     |       |       |       |       |       |       |       |       |       | 1.0   | 0.379 | 0.379 | 0.679 | 0.083 | 0.114 | 0.336 | 0.327 | 0.327 | 0.365 | 0.211 | 0.153 | 0.019 | 0.359 | 0.007 | 0.014 | 0.028 | 0.040 | 0.032 | 0.004 | 0.005 | 0.001 | 0.003 | 0.000 |
| 12 | rs12454763 |     |       |       |       |       |       |       |       |       |       |       | 1.0   | 1.0   | 0.332 | 0.096 | 0.006 | 0.545 | 0.526 | 0.526 | 0.080 | 0.205 | 0.392 | 0.053 | 0.059 | 0.003 | 0.055 | 0.023 | 0.004 | 0.034 | 0.025 | 0.005 | 0.000 | 0.009 | 0.011 |
| 13 | rs991014   |     |       |       |       |       |       |       |       |       |       |       |       | 1.0   | 0.332 | 0.096 | 0.006 | 0.545 | 0.526 | 0.526 | 0.080 | 0.205 | 0.392 | 0.053 | 0.059 | 0.003 | 0.055 | 0.023 | 0.004 | 0.034 | 0.025 | 0.005 | 0.000 | 0.009 | 0.011 |
| 14 | rs881433   |     |       |       |       |       |       |       |       |       |       |       |       |       | 1.0   | 0.072 | 0.100 | 0.576 | 0.565 | 0.565 | 0.609 | 0.415 | 0.132 | 0.038 | 0.308 | 0.030 | 0.010 | 0.006 | 0.030 | 0.013 | 0.001 | 0.015 | 0.000 | 0.013 | 0.001 |
| 15 | rs642513   |     |       |       |       |       |       |       |       |       |       |       |       |       |       | 1.0   | 0.029 | 0.166 | 0.163 | 0.163 | 0.106 | 0.08  | 0.03  | 0.015 | 0.097 | 0.012 | 0.009 | 0.001 | 0.106 | 0.002 | 0.006 | 0.005 | 0.021 | 0.000 | 0.003 |
| 16 | rs17786966 |     |       |       |       |       |       |       |       |       |       |       |       |       |       |       | 1.0   | 0.174 | 0.177 | 0.177 | 0.003 | 0.155 | 0.061 | 0.296 | 0.002 | 0.006 | 0.016 | 0.056 | 0.032 | 0.034 | 0.087 | 0.000 | 0.014 | 0.004 | 0.006 |
| 17 | rs617459   |     |       |       |       |       |       |       |       |       |       |       |       |       |       |       |       | 1.0   | 0.980 | 0.980 | 0.262 | 0.168 | 0.216 | 0.072 | 0.093 | 0.007 | 0.026 | 0.002 | 0.002 | 0.007 | 0.001 | 0.004 | 0.006 | 0.021 | 0.000 |
| 18 | rs663651   |     |       |       |       |       |       |       |       |       |       |       |       |       |       |       |       |       | 1.0   | 0.274 | 0.176 | 0.221 | 0.074 | 0.099 | 0.007 | 0.027 | 0.003 | 0.002 | 0.005 | 0.000 | 0.003 | 0.006 | 0.020 | 0.000 |       |
| 19 | rs3085861  |     |       |       |       |       |       |       |       |       |       |       |       |       |       |       |       |       |       | 1.0   | 0.274 | 0.176 | 0.221 | 0.074 | 0.099 | 0.007 | 0.027 | 0.003 | 0.002 | 0.005 | 0.000 | 0.003 | 0.006 | 0.020 | 0.000 |
| 20 | rs9945057  |     |       |       |       |       |       |       |       |       |       |       |       |       |       |       |       |       |       |       | 1.0   | 0.653 | 0.223 | 0.078 | 0.535 | 0.006 | 0.026 | 0.027 | 0.079 | 0.040 | 0.015 | 0.037 | 0.004 | 0.000 | 0.012 |
| 21 | rs11660213 |     |       |       |       |       |       |       |       |       |       |       |       |       |       |       |       |       |       |       |       | 1.0   | 0.342 | 0.041 | 0.341 | 0.01  | 0.044 | 0.015 | 0.125 | 0.061 | 0.068 | 0.009 | 0.001 | 0.000 | 0.002 |
| 22 | rs2120315  |     |       |       |       |       |       |       |       |       |       |       |       |       |       |       |       |       |       |       |       |       | 1.0   | 0.032 | 0.394 | 0.009 | 0.207 | 0.008 | 0.083 | 0.040 | 0.056 | 0.001 | 0.002 | 0.000 | 0.003 |
| 23 | rs10502845 |     |       |       |       |       |       |       |       |       |       |       |       |       |       |       |       |       |       |       |       |       |       | 1.0   | 0.092 | 0.001 | 0.005 | 0.243 | 0.013 | 0.003 | 0.046 | 0.018 | 0.000 | 0.001 | 0.008 |
| 24 | rs8090594  |     |       |       |       |       |       |       |       |       |       |       |       |       |       |       |       |       |       |       |       |       |       |       | 1.0   | 0.0   | 0.072 | 0.065 | 0.152 | 0.029 | 0.017 | 0.019 | 0.003 | 0.007 | 0.001 |
| 25 | rs11082414 |     |       |       |       |       |       |       |       |       |       |       |       |       |       |       |       |       |       |       |       |       |       |       |       | 1.0   | 0.033 | 0.024 | 0.055 | 0.028 | 0.033 | 0.012 | 0.006 | 0.004 | 0.026 |
| 26 | rs3744825  |     |       |       |       |       |       |       |       |       |       |       |       |       |       |       |       |       |       |       |       |       |       |       |       |       | 1.0   | 0.014 | 0.430 | 0.168 | 0.156 | 0.004 | 0.008 | 0.011 | 0.008 |
| 27 | rs1064204  |     |       |       |       |       |       |       |       |       |       |       |       |       |       |       |       |       |       |       |       |       |       |       |       |       |       | 1.0   | 0.023 | 0.025 | 0.043 | 0.025 | 0.003 | 0.001 | 0.014 |
| 28 | rs8083119  |     |       |       |       |       |       |       |       |       |       |       |       |       |       |       |       |       |       |       |       |       |       |       |       |       |       |       | 1.0   | 0.299 | 0.311 | 0.000 | 0.007 | 0.000 | 0.001 |
| 29 | rs11082420 |     |       |       |       |       |       |       |       |       |       |       |       |       |       |       |       |       |       |       |       |       |       |       |       |       |       |       |       | 1.0   | 0.732 | 0.009 | 0.004 | 0.001 | 0.003 |
| 30 | rs4890500  |     |       |       |       |       |       |       |       |       |       |       |       |       |       |       |       |       |       |       |       |       |       |       |       |       |       |       |       |       | 1.0   | 0.042 | 0.000 | 0.000 | 0.022 |
| 31 | rs10502849 |     |       |       |       |       |       |       |       |       |       |       |       |       |       |       |       |       |       |       |       |       |       |       |       |       |       |       |       |       |       | 1.0   | 0.050 | 0.116 | 0.740 |
| 32 | rs16978256 |     |       |       |       |       |       |       |       |       |       |       |       |       |       |       |       |       |       |       |       |       |       |       |       |       |       |       |       |       |       |       | 1.0   | 0.012 | 0.037 |
| 33 | rs4890506  |     |       |       |       |       |       |       |       |       |       |       |       |       |       |       |       |       |       |       |       |       |       |       |       |       |       |       |       |       |       |       |       | 1.0   | 0.086 |
| 34 | rs7228266  |     |       |       |       |       |       |       |       |       |       |       |       |       |       |       |       |       |       |       |       |       |       |       |       |       |       |       |       |       |       |       |       |       | 1.0   |

**Supplementary Table 2.** Markers spanning SETBP1 that show nominally significant p-values in the gene – behavior targeted association analyses.

| Marker           | Behavioral Traits*    |                             | $\beta$      | <i>p</i>     |
|------------------|-----------------------|-----------------------------|--------------|--------------|
| rs663651         | WJII                  | Picture Vocabulary          | -1.009       | 0.021        |
|                  |                       | Word Attack                 | -1.978       | 0.032        |
|                  |                       | Spelling                    | -2.003       | 0.052        |
|                  | CTOPP                 | Blending Words              | -0.965       | 0.030        |
|                  |                       | Memory for Digits           | -0.863       | 0.032        |
|                  |                       | Blending Non-Words          | -0.784       | 0.040        |
|                  |                       | Non-Word Repetition         | -0.715       | 0.042        |
| GORT             | Oral Reading Quotient | -6.724                      | 0.021        |              |
| rs11082414       | WASI                  | Vocabulary                  | 2.154        | 0.052        |
| rs3744825        | CTOPP                 | Non-Word Repetition         | -1.090       | 0.042        |
|                  |                       | Blending Words              | -1.331       | 0.048        |
| rs1064204        | PPVT                  | Total Score                 | -7.820       | 0.019        |
|                  | WJII                  | Oral Language Recall Direct | -5.902       | 0.031        |
|                  |                       | Oral Comprehension          | -1.642       | 0.041        |
|                  |                       | Picture Vocabulary          | -1.392       | 0.042        |
| rs11660213       | CTOPP                 | Rapid Digits Naming         | -4.613       | 0.019        |
| rs10502845       | WJII                  | Oral Comprehension          | -2.102       | 0.011        |
|                  |                       | Picture Vocabulary          | -1.521       | 0.033        |
|                  |                       | Oral Language Recall Direct | -5.802       | 0.040        |
|                  | CTOPP                 | Blending Words              | -1.679       | 0.020        |
|                  |                       | Memory for Digits           | -1.304       | 0.046        |
|                  | WASI                  | Vocabulary                  | -3.393       | 0.024        |
| rs10502849       | CTOPP                 | Blending Non-Words          | 0.815        | 0.032        |
| rs11872638       | CTOPP                 | Rapid Digits Naming         | 6.123        | 0.033        |
|                  | WJII                  | Oral Language Recall Direct | 4.655        | 0.042        |
| rs17786966       | CTOPP                 | Non-Word Repetition         | -0.946       | 0.046        |
| <b>rs7230525</b> | <b>CTOPP</b>          | <b>Memory for Digits</b>    | <b>1.074</b> | <b>0.007</b> |
| rs7232987        | CTOPP                 | Rapid Digits Naming         | 6.167        | 0.026        |
| rs744279         | PPVT                  | Total Score                 | -7.105       | 0.021        |
|                  | CTOPP                 | Non-Word Repetition         | -1.076       | 0.039        |

|           |       |                             |        |       |
|-----------|-------|-----------------------------|--------|-------|
| rs8090594 | CTOPP | Rapid Digits Naming         | -5.411 | 0.007 |
| rs9945779 | CTOPP | Blending Non-Words          | -1.607 | 0.016 |
|           | WASI  | Vocabulary                  | -3.824 | 0.018 |
|           | WJII  | Oral Comprehension          | -2.172 | 0.020 |
|           |       | Oral Language Recall Direct | -6.834 | 0.031 |

\* Controlled for children's age and sex.

WJII=The Woodcock-Johnson Tests of Achievement (Woodcock et al., 2001); CTOPP=Comprehensive Test of Phonological Processing (Wagner et al., 1999); GORT=Gray Oral Reading Test (Wiederholt, 2001); WASI=Wechsler Abbreviated Scale of Intelligence (Wechsler, 1999); PPVT=Peabody Picture Vocabulary Test (Dunn, 1997). Associations generating the strongest signal after applying the gene-based empirical association as estimated with VEGAS2v02 are reported in bold.

**Supplementary Table 3. Markers spanning SETBP1 that show nominally significant p-values in the gene – behavior targeted association analyses ran only in the Caucasian participants (n=116).**

| Marker           | Behavioral Traits* |                             | $\beta$      | <i>p</i>     |
|------------------|--------------------|-----------------------------|--------------|--------------|
| rs1064204        | PPVT               | Total Score                 | -8.995       | 0.010        |
|                  | WJII               | Oral Language Recall Direct | -6.120       | 0.039        |
|                  |                    | Oral Comprehension          | -1.970       | 0.024        |
|                  |                    | Picture Vocabulary          | -1.487       | 0.036        |
| rs11660213       | CTOPP              | Rapid Digits Naming         | -4.144       | 0.050        |
| rs10502849       | CTOPP              | Blending Non-Words          | 1.010        | 0.010        |
| rs11872638       | CTOPP              | Rapid Digits Naming         | 6.979        | 0.025        |
| <b>rs7230525</b> | <b>CTOPP</b>       | <b>Memory for Digits</b>    | <b>1.245</b> | <b>0.006</b> |
| rs7232987        | CTOPP              | Rapid Digits Naming         | 7.380        | 0.014        |
| rs744279         | PPVT               | Total Score                 | -6.603       | 0.042        |
|                  | CTOPP              | Non-Word Repetition         | -1.290       | 0.021        |
| rs8090594        | CTOPP              | Rapid Digits Naming         | -5.428       | 0.011        |
| rs7228266        | CTOPP              | Blending Non-Words          | 0.981        | 0.016        |
|                  |                    | Blending Words              | 1.007        | 0.035        |
| rs1037939        | CTOPP              | Blending Words              | -0.909       | 0.034        |
| rs11082420       | WJII               | Oral Comprehension          | 1.169        | 0.035        |

\* Controlled for children's age and sex.

WJII=The Woodcock-Johnson Tests of Achievement (Woodcock et al., 2001); CTOPP=Comprehensive Test of Phonological Processing (Wagner et al., 1999); PPVT=Peabody Picture Vocabulary Test (Dunn, 1997).

Associations generating the strongest signal after applying the gene-based empirical association as estimated with VEGAS2v02 are reported in bold.
